# Supplementary material for: Effect of Diet on the Midgut Microbial Composition and Host Immunity of the Fall Armyworm, Spodoptera frugiperda
Source: MDPI journal article supplement (doi:10.3390/biology11111602), 2022-11-01
Supplement: s1 [file s1]

Supplementary Figures and Tables

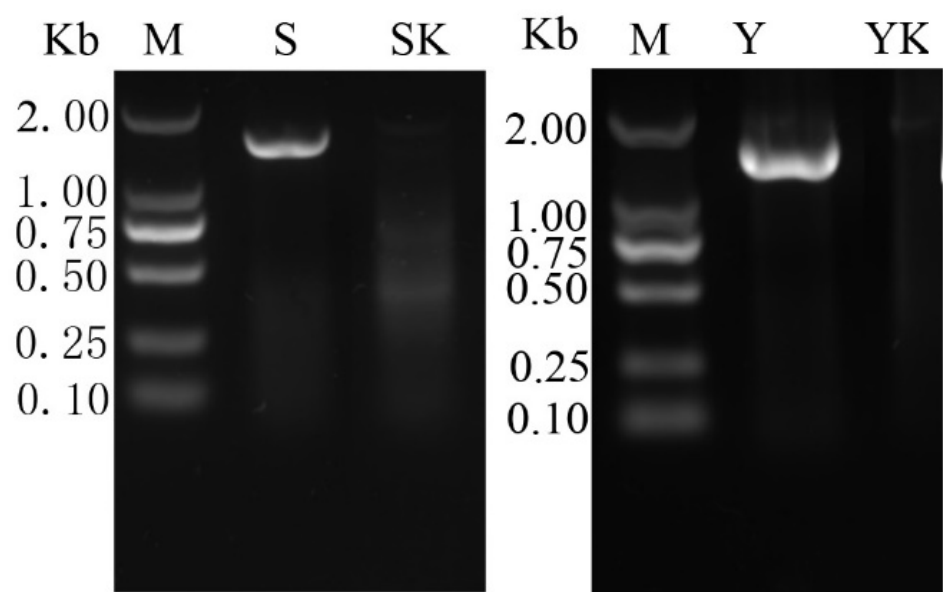

**Figure S1.** PCR amplification of the 16S rDNA gene. YK: field diet with antibiotics, Y: field diet without antibiotics; SK: lab diet with antibiotics, S: lab diet without antibiotics

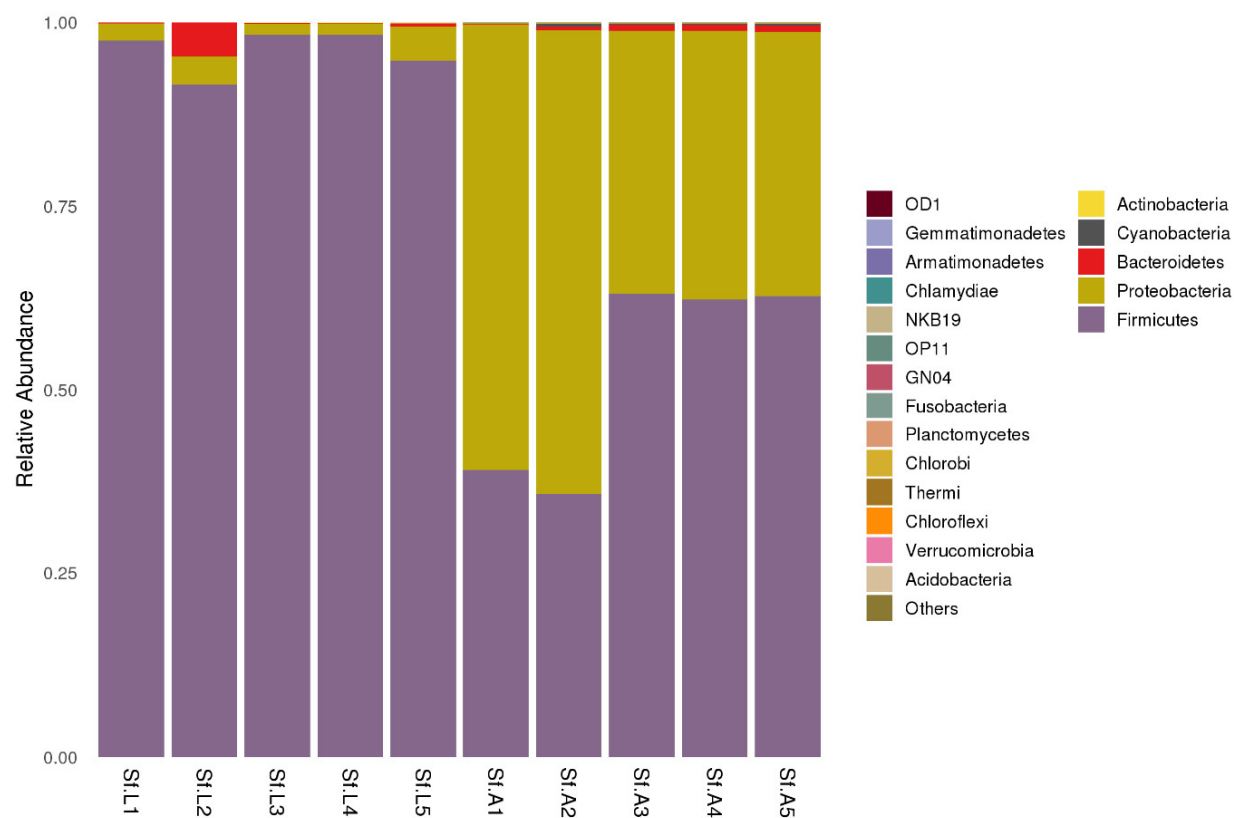

**Figure S2.** Relative abundance of the bacterial community at the phylum level. *S. frugiperda* population feeding on corn leaf (Sf.L1,2,3,4,5); *S. frugiperda* population feeding on starch-rich artificial diet (Sf.A1, 2,3,4,5).

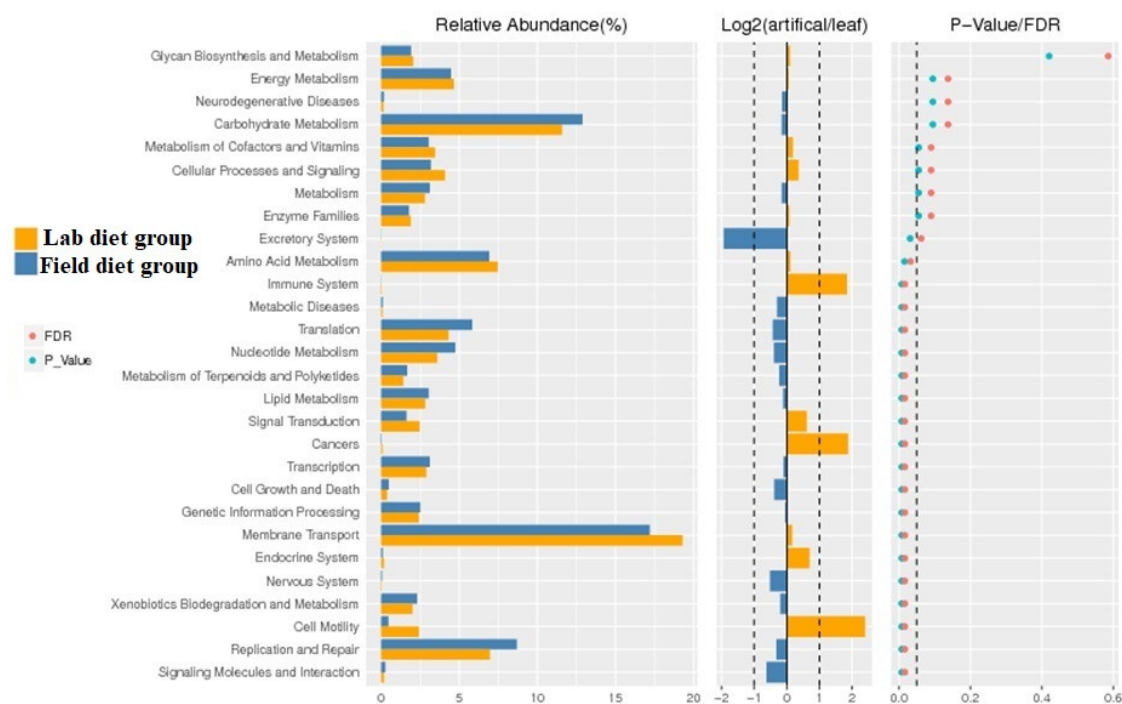

**Figure S3.** Inferred functions of bacterial communities associated with *S. frugiperda*. All of the predicted KEGG metabolic pathways are shown at the second hierarchical level and grouped by major functional categories. Field diet group: *S. frugiperda* population feeding on field diet (corn leaf); Lab diet group: *S. frugiperda* population feeding on lab diet (starch-rich artificial diet).

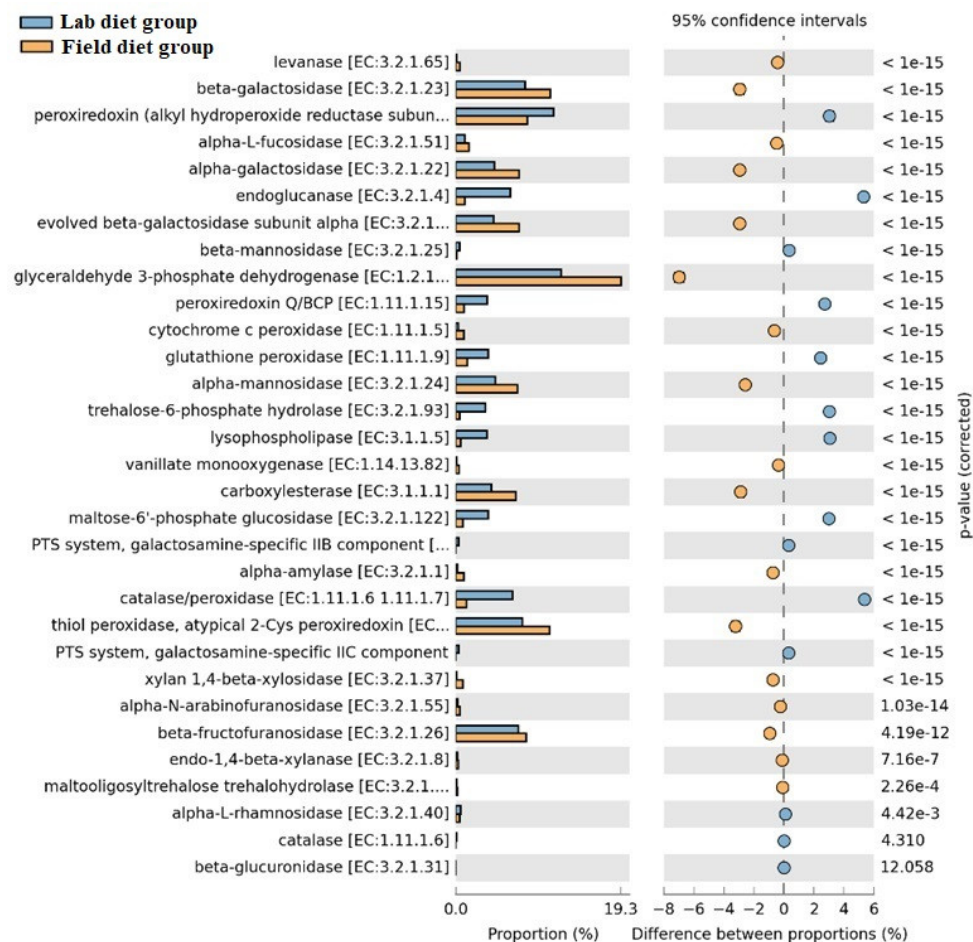

**Figure S4.** Inferred functions of bacterial communities associated with the plant biomass-degrading gene. Field diet group: *S. frugiperda* population feeding on field diet (corn leaf); Lab diet group: *S. frugiperda* population feeding on lab diet (starch-rich artificial diet).

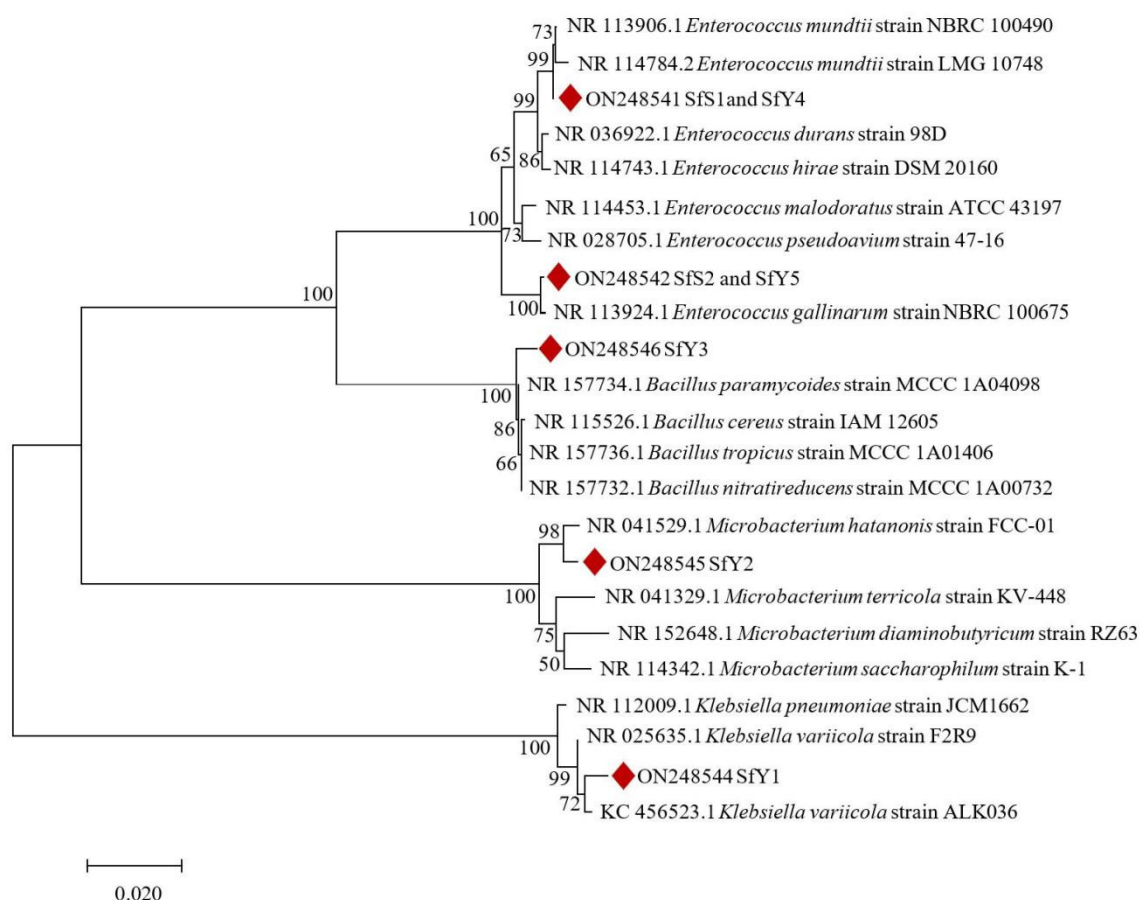

**Figure S5.** Phylogenetic analysis of seven isolates with related bacteria strains based on 16S rDNA sequence. Phylogeny was estimated by using the neighbor-joining method conducted in MEGA7 software. The scale 0.020 is the genetic distance. Bootstrap values (in percent) are based on 1,000 replications. Sequence GenBank accession numbers are shown in close to clade position.

**Table S1.** List of Primers and their sequences used in RT-qPCR.

| Classification                | Gene name      |             | Primer sequence(5'-----3') |
|-------------------------------|----------------|-------------|----------------------------|
| Reference                     | RpL18          | RpL18-F     | GCTCTGCACGTTACCGAGA        |
|                               |                | RpL18-R     | GCAGCAGAACGGTCTTGG         |
| P450s                         | CYP9A60        | CYP9A60-F   | TGTACCAGCTTCTTCGGGAG       |
|                               |                | CYP9A60-R   | CGACCAGCCTGTTGTTGAAA       |
| ABCs                          | ABCC2          | ABCC2-F     | CGATGAGGAAGGTGAGGAGAA      |
|                               |                | ABCC2-R     | CCAACACGAGGAATGCCATTA      |
|                               | ABC C13-like   | ABC C13-F   | ACTACCTCTTGATGCTCCTACA     |
|                               |                | ABC C13-R   | AAGTTCGGCGTCCATATCTG       |
|                               | ABC subG1-like | ABC subG1-F | GCCTCTGTAAGTTCGTCTGCTA     |
|                               |                | ABC subG1-R | CGTCAACATCCTCTTCAGCAAT     |
| GSTs                          | GST D7-like X1 | GST D7-F    | TCAACACACGATTCCGACCAT      |
|                               |                | GST D7-R    | GTAAGCATTGGCGAGGTAAGC      |
|                               | GST 2-like     | GST 2-F     | ATCCGTATGCTGCTGGCTTA       |
|                               |                | GST 2-R     | CGTACTCCTTACCGTCAATCAC     |
| UGTs                          | UGT 1-8-like   | UGT 1-8-F   | GAGGAGGTTTCATCAATGGACTG    |
|                               |                | UGT 1-8-R   | CGTTGTGGTAAGCGTCTTCA       |
|                               | UGT2B19-like   | UGT 2B19-F  | CGTCTTCCAAGCGGTATTCC       |
|                               |                | UGT 2B19-R  | CGTTGCCAATGATGTAGTCACT     |
| AMPs                          | Gloverin-like  | Gloverin-F  | TCGTCTTGAAGGTCAGGCATA      |
|                               |                | Gloverin-R  | GGCGTTGTTATTGTTCCAGTTC     |
|                               | Attacin-A-like | Attacin-A-F | CGGACTGACGGTGATGAAGGAA     |
|                               |                | Attacin-A-R | CGTTGTGGTTGTTCGTTGTGGAA    |
|                               | Attacin-like   | Attacin-F   | GTTCAAGTGCCATTGGAGGAG      |
|                               |                | Attacin-R   | TGTGTTGGTTAGCGAGAGTC       |
| Other immune<br>related genes | Cactus         | Cactus-F    | ACTGACACACAGACCCCA         |
|                               |                | Cactus-R    | TCATCACAGCGAGGTGTAGC       |
|                               | LITAF          | LITAF-F     | AACAGCAACACCAGCAACAG       |
|                               |                | LITAF-R     | AAACAAAGCCCAAGAGCAAA       |
|                               | Relish         | Relish-F    | TATGGCACCAACAAAACGAA       |
|                               |                | Relish-R    | CGATACCACCGAACCTGACT       |
|                               | 16SrRNA        | 27F         | AGAGTTTGATCCTGGCTCAG       |
|                               |                | 1492R       | TACGGTTACCTTGTTACGACTT     |

**Table S2.** The summary of 16S rRNA blast results of cultivable bacteria isolates.

| Strain name | GenBank Accession Number | Blast strains with the highest consistency in blast results (GenBank accession number) % |
|-------------|--------------------------|------------------------------------------------------------------------------------------|
| SfS1        | ON248541                 | <i>Enterococcus mundtii</i> strain NBRC 100490 (NR_113906.1) 100                         |
| SfS2        | ON248542                 | <i>Enterococcus gallinarum</i> strain NBRC 100675 (NR_113924.1) 99.86                    |
| SfY1        | ON248544                 | <i>Klebsiella variicola</i> strain F2R9 (NR_025635.1) 99.93                              |
| SfY2        | ON248545                 | <i>Microbacterium hatanonis</i> strain FCC-01 (NR_041529.1) 98.61                        |
| SfY3        | ON248546                 | <i>Bacillus paramycoides</i> strain MCCC 1A04098 (NR_157734.1) 98.65                     |
| SfY4        | ON248541                 | <i>Enterococcus mundtii</i> strain NBRC 100490 (NR_113906.1) 100                         |
| SfY5        | ON248542                 | <i>Enterococcus gallinarum</i> strain NBRC 100675 (NR_113924.1) 99.86                    |
